# Supplementary material for: The “Infernaccio” Gorges: Microbial Diversity of Black Deposits and Isolation of Manganese-Solubilizing Bacteria
Source: MDPI journal article supplement (doi:10.3390/biology11081204), 2022-08-11
Supplement: s1 [file s1]

## *Supplementary Material*

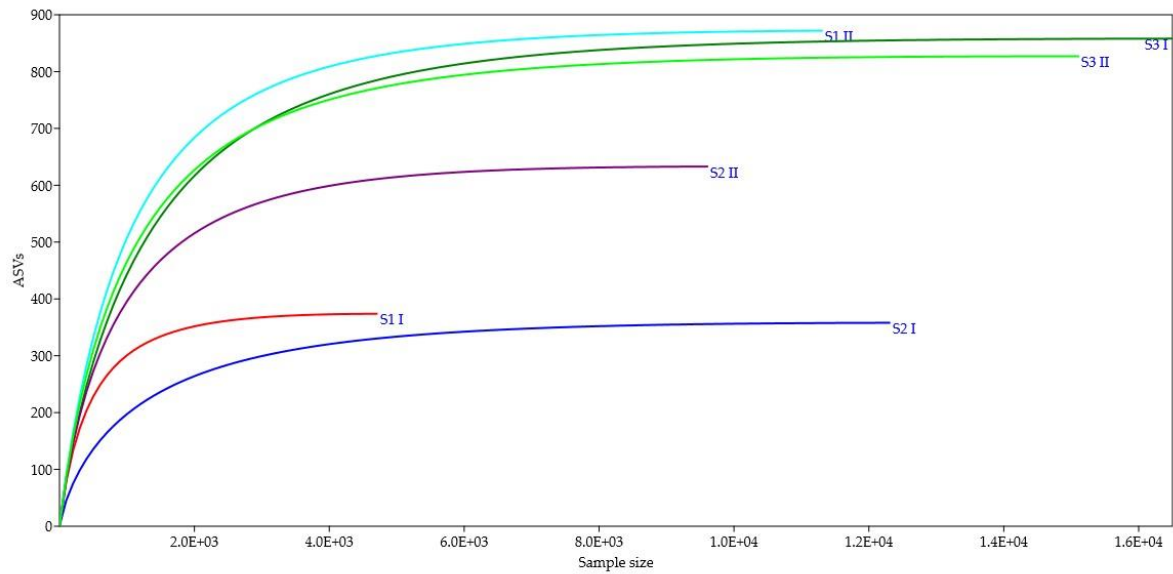

**Figure S1.** Species accumulation plot showing the number of amplicon sequence variants (ASVs) on sample size for each sample.

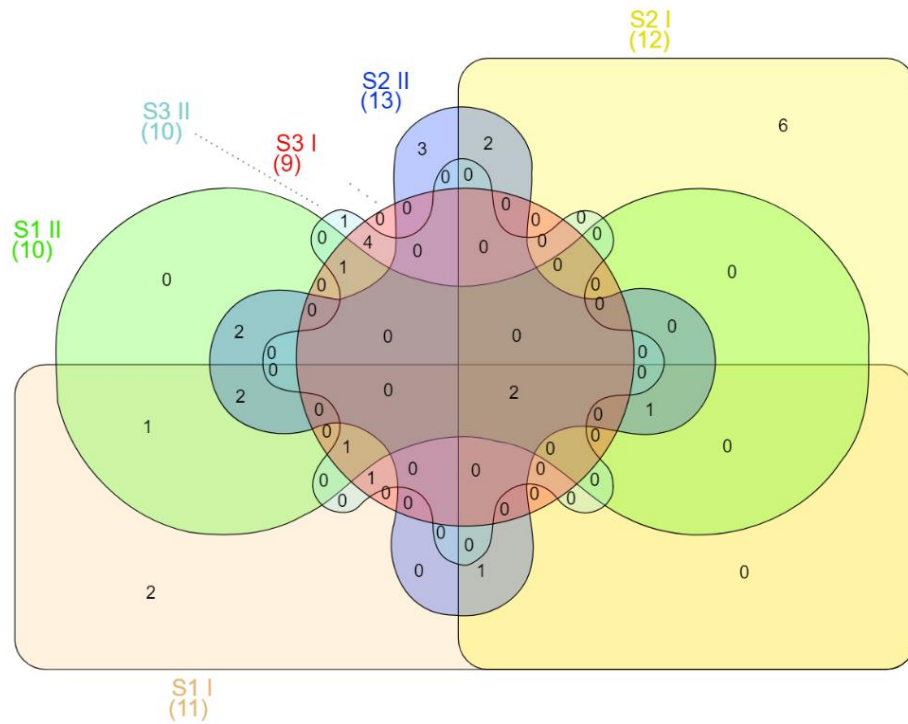

**Figure S2.** Venn diagram underlining the common ASVs (give in brackets) at the family level. In the Figure [S1 I]: env.OPS 17, Xanthomonadaceae; [S2 I]: Bdellovibrionaceae, Hyphomonadaceae, Ilumatobacteraceae, Rhodanobacteraceae, Rhodobacteraceae, Sporichthyaceae; [S3 II]: Pyrinomonadaceae; [S2 II]: Methylomonaceae, Methylophilaceae, Opitutaceae; [S3 I] and [S3 II]: Chthoniobacteraceae, Nocardiodaceae, Solirubrobacteraceae, Xanthobacteraceae; [S1 I] and [S1 II]: Flavobacteriaceae; [S1 II] and [S2 II]: Pedosphaeraceae, Solibacteraceae (Subgroup 3); [S1 I] and [S2 I] and [S2 II]: Burkholderiaceae; [S1 I] and [S1 II] and [S2 II]: Microscillaceae, Nitrosomonadaceae; [S1 I] and [S2 I] and [S1 II] and [S2 II]: Nitrospiraceae; [S1 I] and [S3 I] and [S1 II] and [S3 II]: Gemmatimonadaceae; [S1 I] and [S3 I] and [S3 II]: Sphingomonadaceae; [S1 I] and [S2 I] and [S3 I] and [S1 II] and [S2 II] and [S3 II]: uncultured, unknown; [S3 I] and [S1 II] and [S3 II]: TRA3-20; [S2 I] and [S2 II]: Chitinophagaceae, Gallionellaceae.

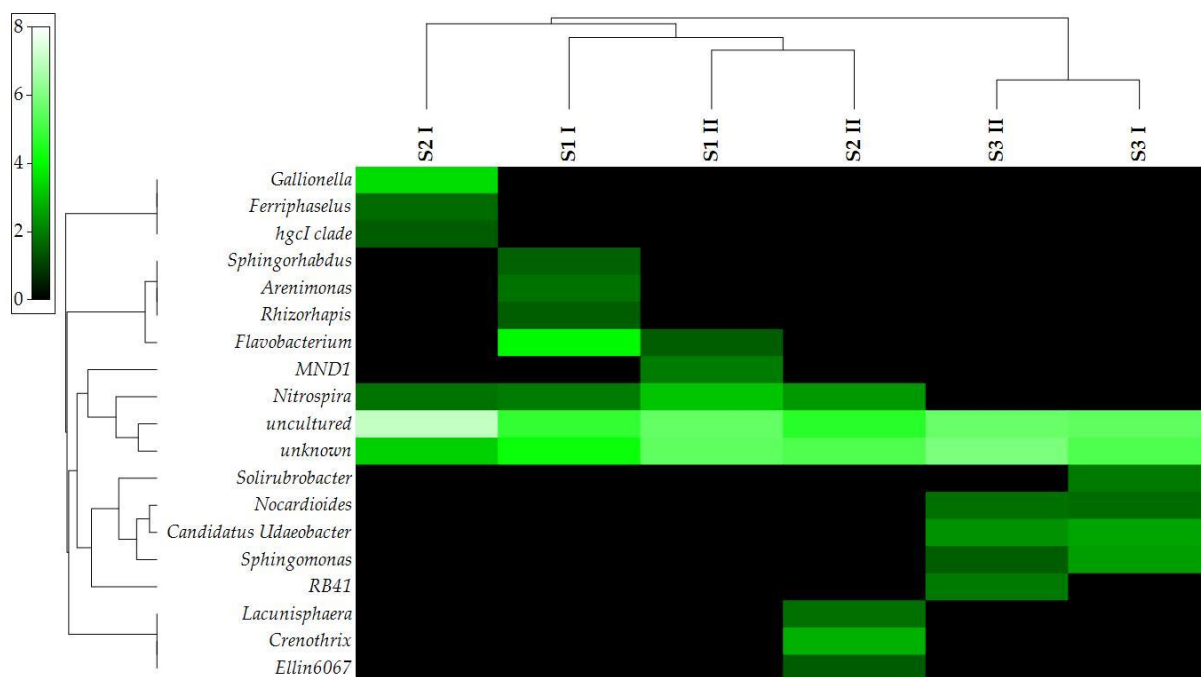

**Figure S3.** Heatmap of the main genera found in the samples. The upper clusterization shows the sample distribution according to taxa presence/absence and abundances. The heat map was realized based on a resemblance matrix (Analysis between variables and measure of the index of association) and hierarchical cluster analysis (Group average cluster mode).

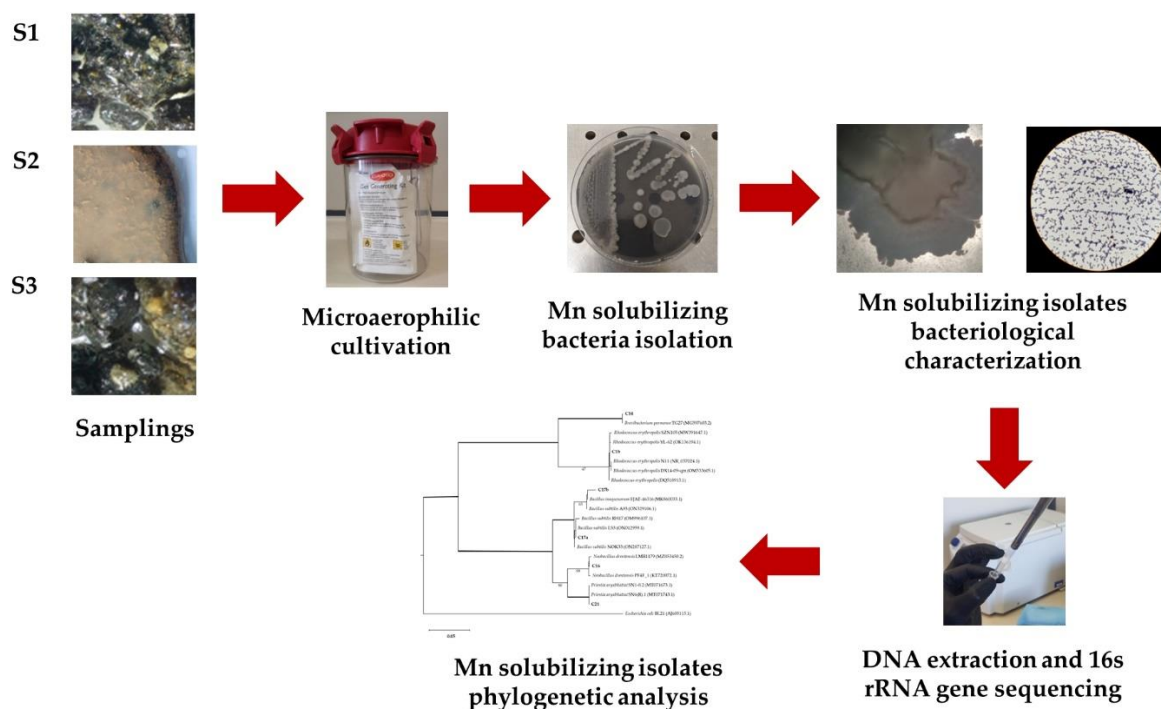

**Figure S4.** Summary of the experiment setup during Mn-oxide solubilizing process.

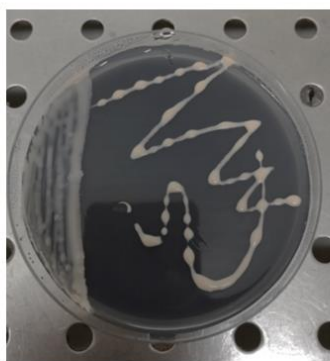

**C1b**

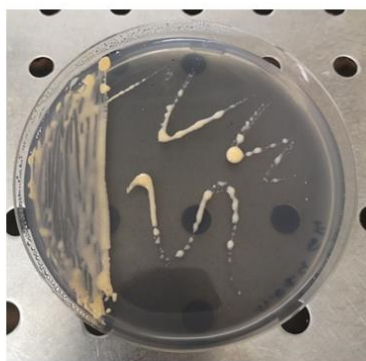

**C14**

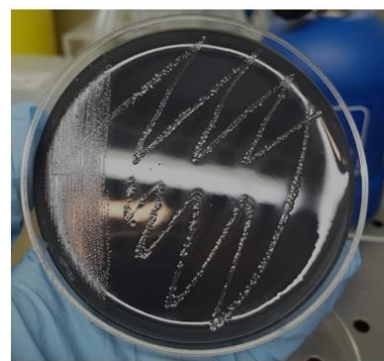

**C16**

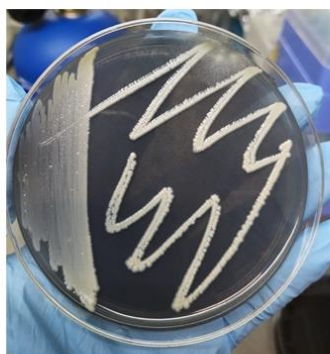

**C17a**

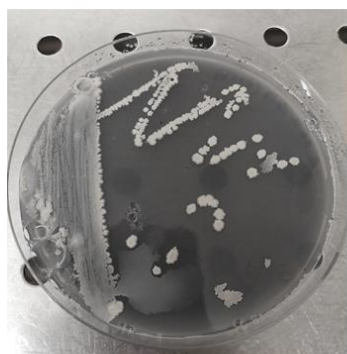

**C17b**

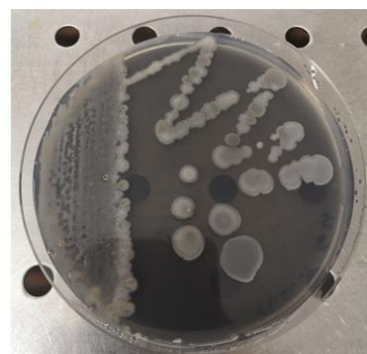

**C21**

**Figure S5.** Mn-oxide solubilizing isolates on manganese basal medium (MMB).
